# Supplementary material for: Iron and nitrogen co-doped graphene quantum dots as highly active peroxidases for the sensitive detection of l-cysteine
Source: Royal Society of Chemistry journal article supplement (doi:10.1039/d1nj03559b), 2021-01-01
Supplement: d1nj03559b1.pdf [file d1nj03559b1.pdf]

## Supplementary Material

### Iron and nitrogen co-doped graphene quantum dots as highly active peroxidase for sensitive detection of L-cysteine

Xiaochun Deng<sup>†,a</sup>, Jingwen Zhao<sup>†,a</sup>, Yao Ding<sup>b</sup>, Hongliang Tang<sup>\*,b</sup>, Fengna Xi<sup>\*,a</sup>

Department of Chemistry, Zhejiang Sci-Tech University, 5 Second Avenue, Xiasha Higher Education Zone, Hangzhou, 310018, PR China

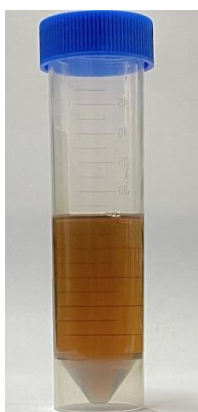

**Fig. S1** The photographs of Fe,N-QQDs solution diluted by a factors 10 after storage at room temperature for one month.

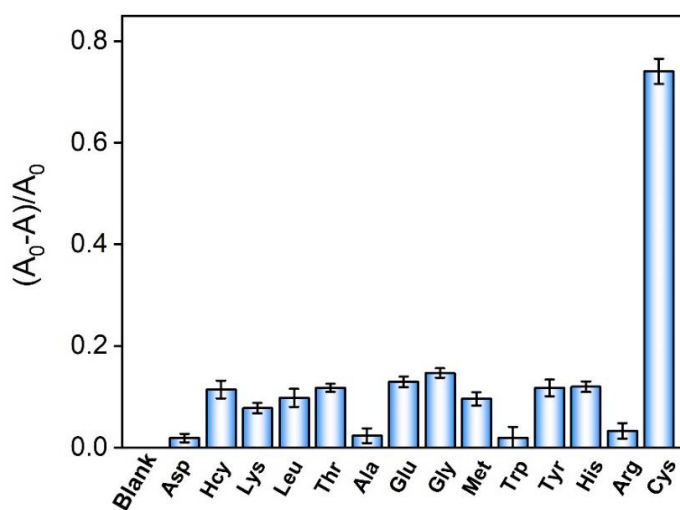

**Fig. S2** The absorbance change ratio of Fe,N-QQDs+H<sub>2</sub>O<sub>2</sub>+TMB after different kinds of amino acids (50 μM) was added and reacted for 10 min.

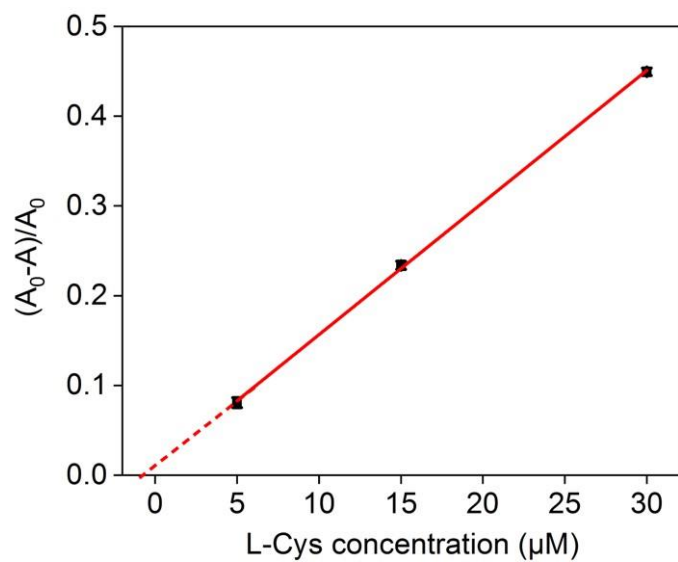

**Fig. S3** Linear calibration plot for L-Cys detection in amino acid tablets solution based on the peroxidase of Fe,N-GQDs.

**Table S1** The apparent Michaelis-Menten constants ( $K_m$ ) and maximum reaction rates ( $V_{max}$ ) of different catalysts

| Catalyst                                                       | Substrate |                        | Substrate                     |                        | Reference |
|----------------------------------------------------------------|-----------|------------------------|-------------------------------|------------------------|-----------|
|                                                                | TMB       |                        | H <sub>2</sub> O <sub>2</sub> |                        |           |
|                                                                | $K_m$     | $V_{max}$              | $K_m$                         | $V_{max}$              |           |
|                                                                | (mM)      | (10 <sup>-8</sup> M/s) | (mM)                          | (10 <sup>-8</sup> M/s) |           |
| HRP                                                            | 0.434     | 10                     | 2.39                          | 4.36                   | [1]       |
| SWNT-NH <sub>2</sub> @hemin                                    | 0.528     | 10.08                  | 26.012                        | 22.558                 | [2]       |
| PEI-rGO-Hemin-BSA                                              | 1.8       | 8.451                  | 2.13                          | 2.339                  | [3]       |
| MA-Hem/Au-Ag                                                   | 2.39      | 1.42                   | 2.7                           | 14.1                   | [4]       |
| Hemin-porous g-C <sub>3</sub> N <sub>4</sub> hybrid nanosheets | 0.119     | 11.6                   | 0.682                         | 2                      | [5]       |
| His-GQD/hemin                                                  | 0.133     | 9.7                    | 3.8                           | 10.55                  | [6]       |
| Fe,N-GQDs                                                      | 0.1351    | 15.99                  | 1.905                         | 12.09                  | This work |

**Table S2** Comparison of the performance for detection of L-Cys using different carbon-based materials

| Sensing method   | Material                                                   | Detection limit   | Linear range      | Reference |
|------------------|------------------------------------------------------------|-------------------|-------------------|-----------|
|                  |                                                            | ( $\mu\text{M}$ ) | ( $\mu\text{M}$ ) |           |
| Colorimetry      | Ag <sup>+</sup> -CDs                                       | 0.82              | 1-60              | [7]       |
| Colorimetry      | g-C <sub>3</sub> N <sub>4</sub>                            | 0.2               | 1-20              | [8]       |
| Colorimetry      | FeCo carbon nanofibers                                     | 0.15              | 1-20              | [9]       |
| Electrochemistry | N-doped rGO modified<br>with Y <sub>2</sub> O <sub>3</sub> | 0.8               | 1.3-720           | [10]      |
|                  | Carbon electrode<br>modified with carbon<br>dots           |                   | 0.3-3.6           |           |
| Electrochemistry | Lucigenin-carbon dots                                      | 8.8               | 10-100            | [12]      |
| Fluorometry      | N-CDs                                                      | 0.35              | 0-100             | [13]      |
| Fluorometry      | N-acetyl-L-cysteine-<br>capped AuNPs-CDs                   | 0.16              | 1.0-110           | [14]      |
| Fluorometry      | AuNCs-CDs                                                  | 0.96              | 1-100             | [15]      |
| Fluorometry      | N,S-CQDs                                                   | 0.54              | 10-200            | [16]      |
| Colorimetry      | Fe,N-GQDs                                                  | 0.14              | 0.5-50            | This work |

## References

- 1 L. Gao, J. Zhuang, L. Nie, J. Zhang, Y. Zhang, N. Gu, T. Wang, J. Feng, D. Yang, S. Perrett and X. Yan, *Nat. Nanotechnol.*, 2007, **2**, 577-583.
- 2 W. Wu, Q. Wang, J. Chen, L. Huang, H. Zhang, K. Rong and S. Dong, *Nanoscale*, 2019, **11**, 12603-12609.
- 3 X. Zhang, Y. Yu, J. Shen, W. Qi and H. Wang, *Anal. Chim. Acta*, 2019, **1070**, 80-87.
- 4 H. Liu, Y. Hua, Y. Cai, L. Feng, S. Li and H. Wang, *Anal. Chim. Acta*, 2019, **1092**, 57-65.
- 5 Y. Wang, R. L. Liu, G. N. Chen, L. Wang, P. Yu, H. Shu, K. Bashir and Q. Fu, *Microchim. Acta*, 2019, **186**, 446.
- 6 Q. Xin, X. Jia, A. Nawaz, W. Xie, L. Li and J. R. Gong, *Nano Res.*, 2020, **13**, 1427-1433.
- 7 X. Ma, W. Liao, H. Zhou, Y. Tong, F. Yan, H. Tang and J. Liu, *J Mater Chem B*, 2020, **8**, 10630-10636.
- 8 Y. Wu, Q. Chen, S. Liu, H. Xiao, M. Zhang and X. Zhang, *Chin Chem Lett*, 2019, **30**, 2186-2190.
- 9 Z. Yang, Y. Zhu, G. Nie, M. Li, C. Wang and X. Lu, *Dalton Trans.*, 2017, **46**, 8942-8949.
- 10 S. Yang, G. Li, Y. Wang, G. Wang and L. Qu, *Microchim. Acta*, 2016, **183**, 1351-1357.
- 11 N. Amini, M. Shamsipur, M. B. Gholivand and A. Barati, *Microchem. J.*, 2017, **131**, 9-14.
- 12 Y. L. Xu, R. B. Bai, C. Y. Qi, Z. Ren, X. Z. Jia, Z. G. Kan, C. L. Li and F. Wang, *J Fluoresc*, 2019, **29**, 819-825.
- 13 C. Wang, Y. Lan, F. Yuan, T. H. Fereja, B. Lou, S. Han, J. Li and G. Xu, *Microchim. Acta*, 2019, **187**, 50.
- 14 Y. L. Xu, R. B. Bai, C. Y. Qi, Z. Ren, X. Z. Jia, Z. G. Kan, C. L. Li and F. Wang, *J Fluoresc*, 2019, **29**, 819-825.
- 15 B. Han, Y. Li, X. Hu, Q. Yan, J. Jiang, M. Yu, T. Peng and G. He, *Anal. Methods*, 2018, **10**, 3945-3950.
- 16 H. Wu, J. Jiang, X. Gu and C. Tong, *Microchim. Acta*, 2017, **184**, 2291-2298.
